# Supplementary material for: The influence of transition metal oxides on the kinetics of Li2O2oxidation in Li–O2batteries: high activity of chromium oxides
Source: Royal Society of Chemistry journal article supplement (doi:10.1039/c3cp53330a), 2013-11-29
Supplement: c3cp53330a.pdf [file c3cp53330a.pdf]

## Supporting Information

### The influence of transition metal oxides on the kinetics of $\text{Li}_2\text{O}_2$ oxidation for Li- $\text{O}_2$ batteries

Koffi P.C. Yao,<sup>a</sup> Yi-Chun Lu,<sup>b</sup> Chibueze V. Amanchukwu,<sup>c</sup> David G. Kwabi,<sup>a</sup> Marcel Risch,<sup>a</sup> Jigang Zhou,<sup>d</sup> Alexis Grimaud,<sup>a</sup> Paula T. Hammond,<sup>c</sup> Fanny Bardé,<sup>e</sup> and Yang Shao-Horn,<sup>\*a,b</sup>

<sup>a</sup> Department of Mechanical Engineering, Massachusetts Institute of Technology, 77 Massachusetts Avenue, Cambridge, MA 02139, USA. Email: shao-horn@mit.edu

<sup>b</sup> Department of Materials Science and Engineering, Massachusetts Institute of Technology, 77 Massachusetts Avenue, Cambridge, MA 02139, USA

<sup>c</sup> Department of Chemical Engineering, Massachusetts Institute of Technology, 77 Massachusetts Avenue, Cambridge, MA 02139, USA

<sup>d</sup> Canadian Light Source Inc., University of Saskatchewan, Saskatoon, SK S7N 0X4, CANADA

<sup>e</sup> Toyota Motor Europe, Research & Development 3, Advanced Technology 1, Hoge Wei 33 B, B-1930 Zaventem, Belgium

**Present addresses:**

Author Yi-Chun Lu: Department of Mechanical and Automation Engineering, The Chinese University of Hong Kong, Hong Kong, P. R. China.

### **Details of perovskites synthesis**

Two methods were used to obtain the perovskites investigated in the present thesis: co-precipitation and nitrates combustion. All methods have been reported previously, therefore, are described briefly below. Reference to the original work is provided.

**Co-precipitation<sup>1</sup>** was used for the synthesis of  $\text{LaCrO}_3$ ,  $\text{LaNiO}_3$  and  $\text{LaMnO}_{3+\delta}$ . Nitrates of lanthanum and the transition metal (99.98%, Alfa Aesar) were mixed in de-ionized water (Milli-Q water,  $18 \text{ M}\Omega\cdot\text{cm}$ ) at metal molar ratio of 1:1 and total concentration of 0.2 M. The solution was subsequently titrated using an aqueous 1.2 M solution of tetramethylammonium hydroxide (100%, Alfa Aesar) resulting in precipitation. The precipitate was then filtered and collected to dry. Finally, the precipitate powder is heat treated in a tube oven at  $\sim 1000^\circ\text{C}$  under dry air for approximately 10 hours.

**Nitrate combustion<sup>2</sup>** was used for the synthesis of  $\text{Ba}_{0.5}\text{Sr}_{0.5}\text{Co}_{0.8}\text{Fe}_{0.2}\text{O}_3$  and  $\text{LaFeO}_3$ . Nitrates of the rare earth and transition metal cations (Sigma Aldrich,  $> 99.99\%$ ) were mixed in a 2000 mL beaker at the required molar ratios of cations and total metal concentration of 0.2 M. Approximately, 0.1 M glycine was added to the mixture and homogenized using a magnetic stir plate. The mixture was heated until full evaporation of the water, followed by combustion of the solid deposit within the beaker on the heating plate. The powder was collected and heat treated under dry air at  $\sim 1000^\circ\text{C}$  for 24 hours in a tube furnace.

Purity of the synthesized perovskites was investigated using a PANalytical X'Pert Pro<sup>TM</sup> X-ray diffractometer with copper  $K_\alpha$  wavelength ( $\lambda = 1.5418 \text{ nm}$ ). All obtained materials were confirmed to be optimally pure (Fig. S1). Some minor impurities estimated below 1% of the total perovskite phase were observed for  $\text{LaCrO}_3$  and  $\text{LaMnO}_3$  and are not expected to influence the subsequent electrochemical studies.

**Ball-milling of perovskites:** All powders were ball-milled using planetary ball mill (Pulverisette 6, Fritsch Inc.) at 500 rpm for 15 hours reversing every 30 minutes. Milling reversal was preceded by a 15 minutes cooling pause. A zirconium oxide milling crucible and one-millimeter diameter zirconia milling balls were employed.

### **Nomenclature notes:**

In the subsequent figure captions, Nafion<sup>®</sup> is used to refer to lithium exchanged Nafion<sup>®</sup> (Ion Power USA, LITHion<sup>TM</sup>, 7.2 wt%). All specified component ratios in composite electrodes are mass ratios.

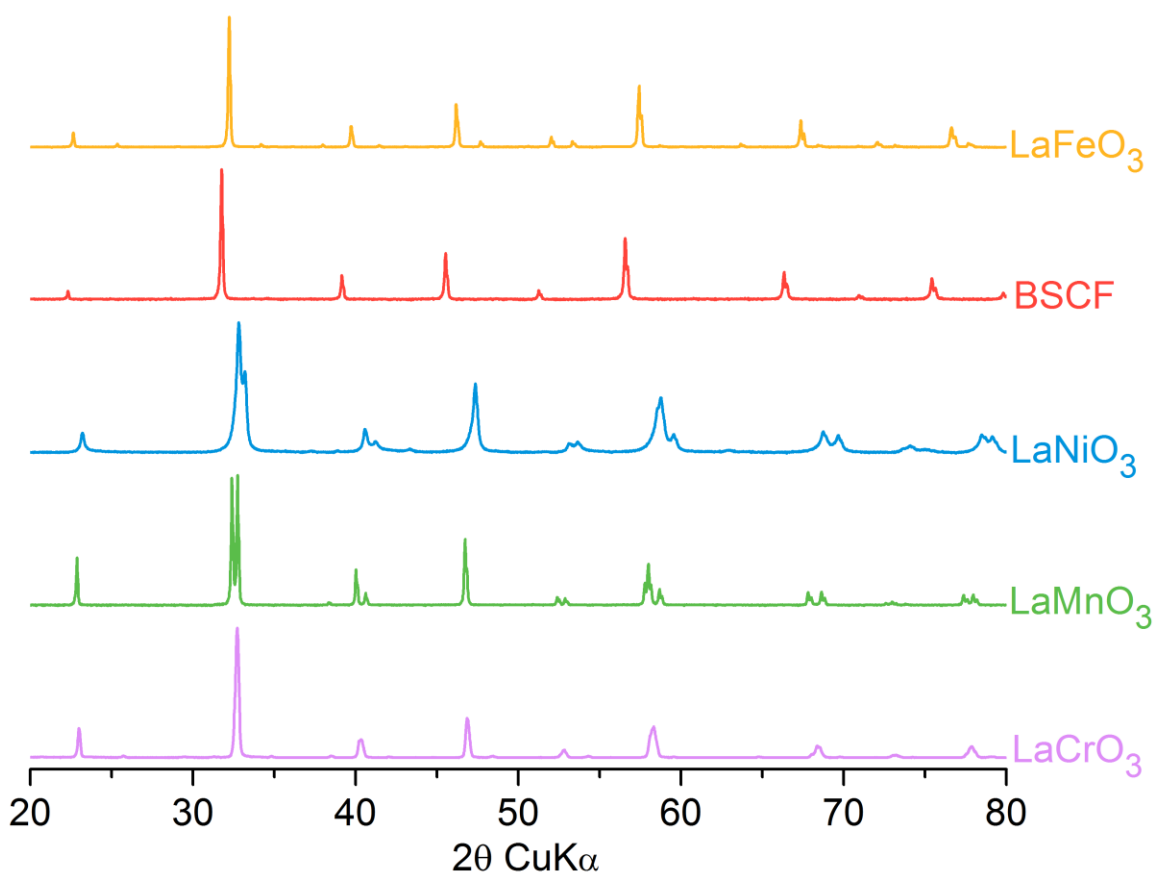

**Fig. S1:** Phase purity of as-synthesized perovskites investigated by X-ray diffraction. Optimal purity of each perovskite is observed. Minor impurity phases estimated to less than 1% (peaks not very visible) were detected for LaCrO<sub>3</sub> and LaMnO<sub>3</sub>.

### **Background subtraction:**

Background current (normalized to carbon mass) is subtracted from cell currents (normalized to carbon mass) in the time domain to arrive at “net currents” (see Fig. S2). Capacity is calculated by integrating the “net current” in time. Area specific current are also calculated from “net current”.

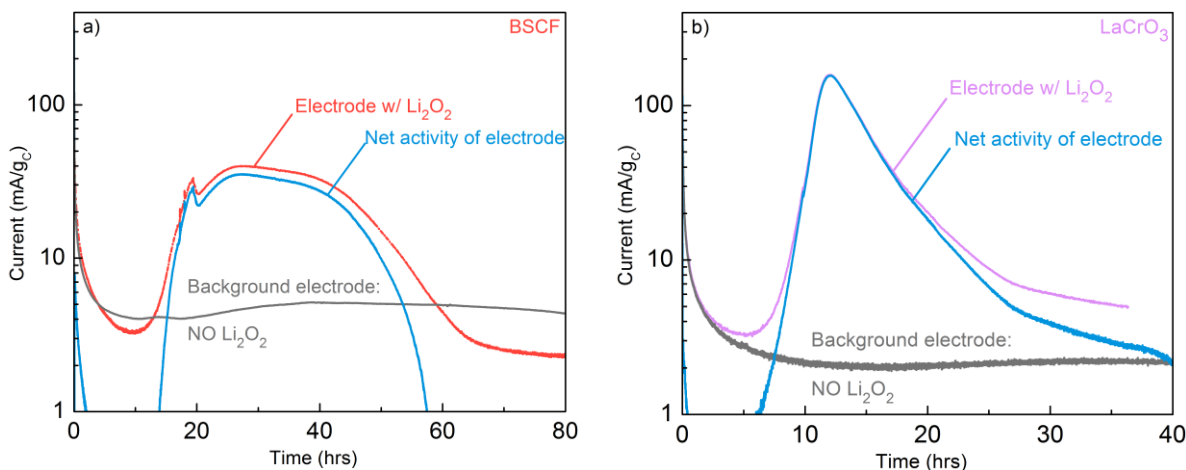

**Fig. S2:** Example of background subtraction performed on (a) BSCF:VC:Li<sub>2</sub>O<sub>2</sub>:Nafion<sup>®</sup> = 3:1:1:1 and (b) LaCrO<sub>3</sub>:VC:Li<sub>2</sub>O<sub>2</sub>:Nafion<sup>®</sup> = 3:1:1:1 electrodes at 4.0 V<sub>Li</sub>. Little change is observed in the final current (Net activity of electrode), which highlights the negligible magnitude of parasitic currents compared to actual Li<sub>2</sub>O<sub>2</sub> oxidation currents. Negligible and featureless current curves of the electrode with no Li<sub>2</sub>O<sub>2</sub> compared to electrode with Li<sub>2</sub>O<sub>2</sub> proves that the observed performance of peroxide packed electrodes is due to effective oxidation of Li<sub>2</sub>O<sub>2</sub>.

**SEM images of pristine and charged perovskite-catalyzed,  $\text{Li}_2\text{O}_2$ -preloaded electrodes**

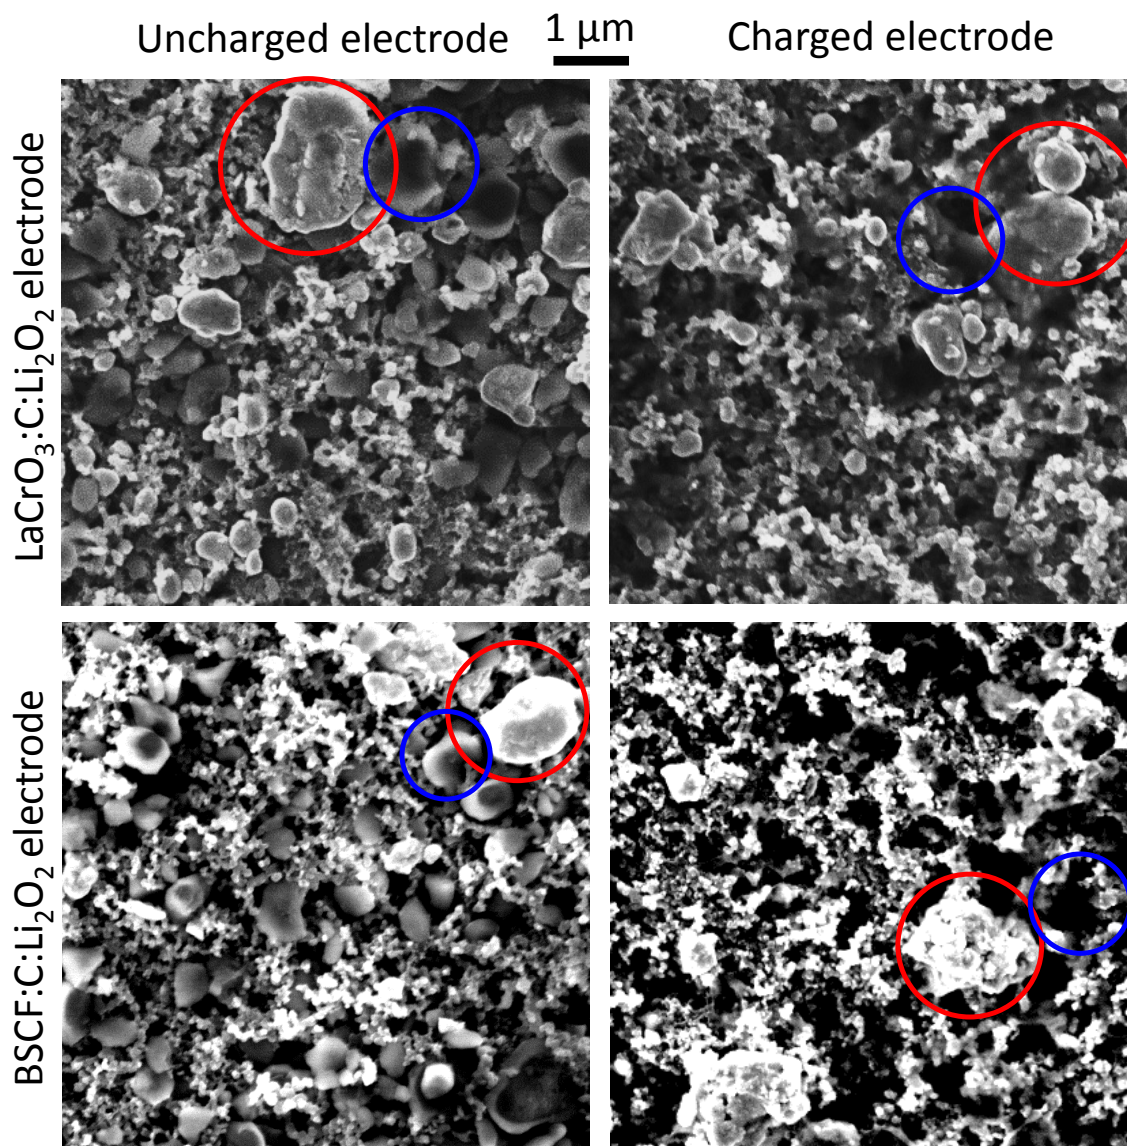

**Fig. S3:** SEMs of  $\text{LaCrO}_3\text{:VC:Li}_2\text{O}_2\text{:Nafion}^\text{®} = 3\text{:}1\text{:}1\text{:}1$  and  $\text{BSCF:VC:Li}_2\text{O}_2\text{:Nafion}^\text{®} = 3\text{:}1\text{:}1\text{:}1$  electrodes. (left): Pristine electrodes displaying  $\text{Li}_2\text{O}_2$  and perovskite particles surrounded by carbon. (right): Charged electrodes contains no visible  $\text{Li}_2\text{O}_2$  particles after 100% charging. Red circle: Perovskite particles location; Blue circle:  $\text{Li}_2\text{O}_2$  particles location.

**Charging curves of BSCF-catalyzed electrodes at 3.9, 4.0, and 4.1 V<sub>Li</sub>**

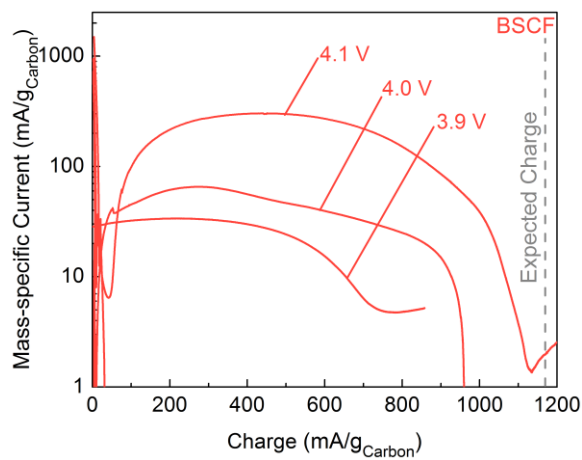

**Fig. S4:** Net currents normalized to carbon mass from potentiostatic charging of BSCF:VC:Li<sub>2</sub>O<sub>2</sub>:Nafion<sup>®</sup> = 3:1:1:1 at 4.0 V<sub>Li</sub>.

### **Determination of cell average current**

The cell's average current is calculated by integrating the "net current" in the range of 0 to 20% charge (Fig. S5) and dividing by the range of charge (mathematical average of the "net current" in the 0-20% charge range). This average is then normalized on mass or surface area bases. When reporting the average for a specific catalyst, the average current calculated per the above described method is further averaged over at least three charged cells.

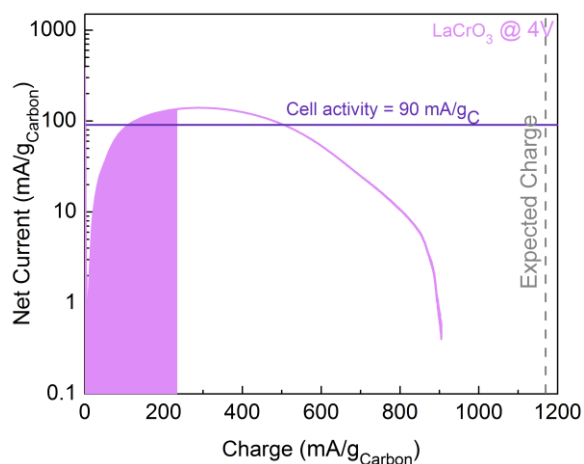

**Fig. S5:** Graphical representation of calculation of the mathematical average used to quantify cell activity

**Plot of average current at 4.0 V<sub>Li</sub> vs. eg-filling**

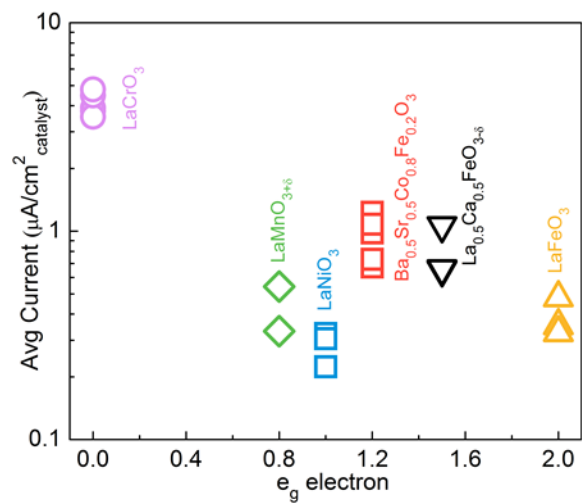

**Fig. S6:** Catalyst-area specific activity of Perovskite:Vulcan carbon:Li<sub>2</sub>O<sub>2</sub>:Nafion<sup>®</sup> = 3:1:1:1 electrodes vs. reported oxide e<sub>g</sub>-filling. Contrary to H<sub>2</sub>O oxidation in aqueous 0.1 M KOH<sup>2</sup>, no volcano trend is found between e<sub>g</sub>-filling and perovskite activity during oxidation of Li<sub>2</sub>O<sub>2</sub>.



**SEM images of pristine and charged Cr NP-catalyzed  $\text{Li}_2\text{O}_2$ -preloaded electrodes**

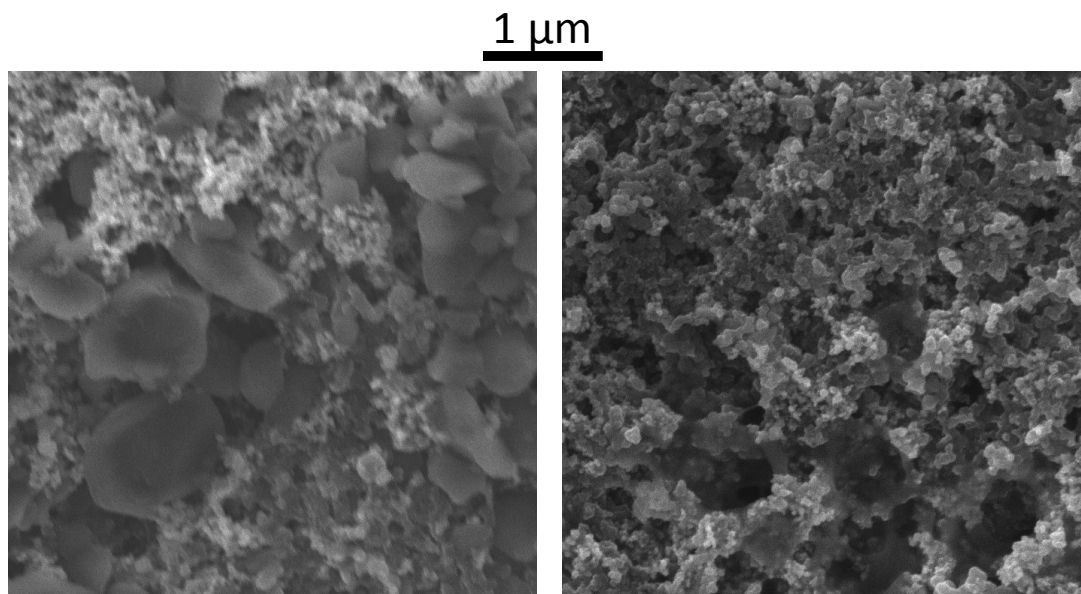

**Fig. S7:** SEMs of  $\text{Cr:VC:Li}_2\text{O}_2\text{:Nafion}^\text{®} = 0.66:1:1:1$  electrodes catalyzed electrodes with preloaded  $\text{Li}_2\text{O}_2$ . (left): Pristine electrodes displaying  $\text{Li}_2\text{O}_2$  and Cr nanoparticles (Cr NP) decorating carbon surfaces. (right): Similar electrode after charging at  $3.9 \text{ V}_{\text{Li}}$  contains no visible  $\text{Li}_2\text{O}_2$  particles after 100% charging; instead holes corresponding to the  $\sim 350 \text{ nm}$   $\text{Li}_2\text{O}_2$  are observed. Small Cr NP still litter the carbon surfaces post charging.

## Assessment of parasitic oxidation in Cr NP-catalyzed electrodes

### 1- Electrochemical assessment

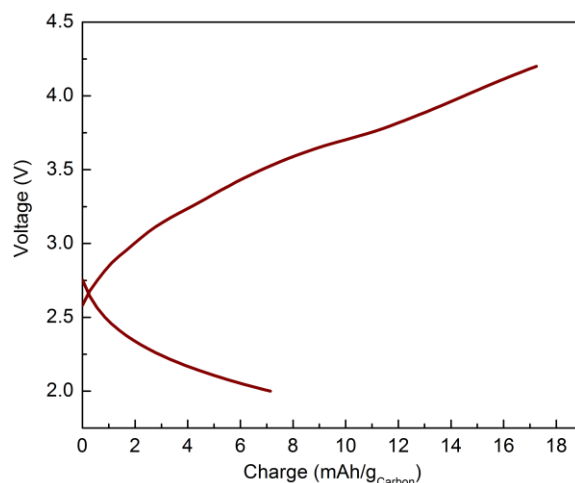

**Fig. S8:** Discharge and charge at  $100 \text{ mA g}^{-1}_{\text{Carbon}}$  under argon atmosphere of a Cr/C ( $\text{Cr:C:Nafion}^{\text{®}} = 2:1:0.5$ ). The output charge ( $< 18 \text{ mAh g}^{-1}_{\text{Carbon}}$ ) is well below the  $\sim 750 \text{ mAh g}^{-1}_{\text{Carbon}}$  observed for the same electrode under oxygen atmosphere (Fig. 5 of main manuscript).

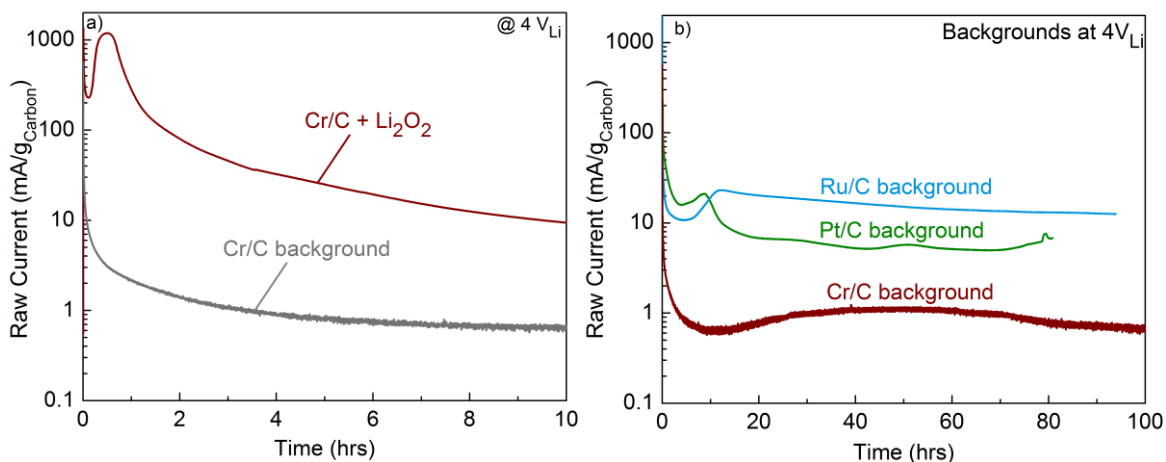

**Fig. S9:** (a) Potentiostatic charging profile of  $\text{Cr:C:Li}_2\text{O}_2\text{:Nafion}^{\text{®}} = 0.66:1:1:1$  compared to that of its background ( $\text{Li}_2\text{O}_2$ -free) at  $4 \text{ V}_{\text{Li}}$ . The small average current ( $\sim 1 \text{ mA g}^{-1}_{\text{Carbon}}$ ) of the background compared to that of the  $\text{Li}_2\text{O}_2$ -preloaded electrode ( $\sim 1000 \text{ mA g}^{-1}_{\text{Carbon}}$ ) indicates negligible parasitic electrolyte oxidation in presence of Cr NP. (b) Comparison of background oxidation currents at  $4 \text{ V}_{\text{Li}}$  in presence of Cr, Pt and Ru ( $\text{Cr,Pt,Ru:C:Nafion}^{\text{®}} = 0.66:1:0.5$ ) without  $\text{Li}_2\text{O}_2$ . The observed parasitic oxidation current is a factor of 10 higher on the surfaces of noble metal Pt and Ru.

## 2- Spectroscopic assessment

To investigate the extent of parasitic electrolyte decomposition accompanying the enhanced  $\text{Li}_2\text{O}_2$  oxidation in presence of Cr NP, solid deposits on electrodes post-charging at 3.9  $V_{\text{Li}}$  and 4.0  $V_{\text{Li}}$  were probed using nuclear magnetic resonance (NMR) spectroscopy. A Bruker AVANCE 400 NMR spectrometer was used to collect all  $^1\text{H}$  NMR data. Lithium formate ( $\text{HCOOLi}$ ) and acetate ( $\text{CH}_3\text{COOLi}$ ) are reported as the main decomposition products of ether solvents.<sup>3,4</sup> The experimental procedure used to probe these products is reported elsewhere,<sup>4</sup> and is briefly described below:

- $\text{C}:\text{Li}_2\text{O}_2:\text{Nafion}^{\text{®}} = 1:1:1$ ,  $\text{Cr}:\text{C}:\text{Li}_2\text{O}_2:\text{Nafion}^{\text{®}} = 0.66:1:1:1$ , and  $\text{Cr}:\text{C}:\text{Nafion}^{\text{®}} = 0.66:1:1$  electrodes are charged at either 3.9  $V_{\text{Li}}$  or 4.0  $V_{\text{Li}}$ . Representative charge profiles are shown in Fig. 3 of the main manuscript.
- All electrodes are triple washed with acetonitrile to selectively remove inorganic lithium salts such as  $\text{LiClO}_4$  used in the electrolyte. Organic salts such as  $\text{HCOOLi}$  and  $\text{CH}_3\text{COOLi}$  do not dissolve in acetonitrile.
- Electrodes are then immersed in 0.65 mL  $\text{D}_2\text{O}$  for 4 hours to dissolve any organic salts from electrolyte decomposition.
- The  $\text{D}_2\text{O}$  wash is collected for  $^1\text{H}$  NMR

Assignment of NMR peaks for  $\text{HCOOD}$  (representing  $\text{HCOOLi}$ ) and  $\text{CH}_3\text{COOD}$  (representing  $\text{CH}_3\text{COOLi}$ ) are based on the works of Freunberger et al.<sup>3</sup> and Black et al.<sup>4</sup> The following results are gathered from the NMR spectra shown in Fig. S10 below:

$\text{C}:\text{Li}_2\text{O}_2:\text{Nafion}^{\text{®}} : ^1\text{H}$  NMR (400 MHz,  $\text{D}_2\text{O}$ )  $\delta$  ppm 8.47 (s, 1H), 2.08 (s, 3H)

$\text{Cr}:\text{C}:\text{Li}_2\text{O}_2$  at 3.9V :  $^1\text{H}$  NMR (400 MHz,  $\text{D}_2\text{O}$ )  $\delta$  ppm 8.45 (s, 1H), 1.91 (s, 3H)

$\text{Cr}:\text{C}:\text{Li}_2\text{O}_2$  at 4V :  $^1\text{H}$  NMR (400 MHz,  $\text{D}_2\text{O}$ )  $\delta$  ppm 8.45 (s, 1H)

$\text{Cr}:\text{C}$  at 4V : No peaks corresponding to  $\text{HCOOLi}$  or  $\text{CH}_3\text{COOLi}$

It is clear that formation of  $\text{HCOOLi}$  and  $\text{CH}_3\text{COOLi}$  occurs irrespective of the presence or absence of Cr NP in all electrodes containing  $\text{Li}_2\text{O}_2$ . Comparison of spectral intensities of the  $\text{HCOOD}$  and  $\text{CH}_3\text{COOD}$  peaks between Cr NP electrodes and carbon-only electrodes suggests no enhanced electrolyte decomposition in presence of Cr NP. Background electrodes of Cr NP without  $\text{Li}_2\text{O}_2$  charged at 4.0  $V_{\text{Li}}$  show no electrolyte decomposition products, which confirms the relative benign effect of Cr NP on the dimethoxyethane electrolyte seen in Fig. S9.

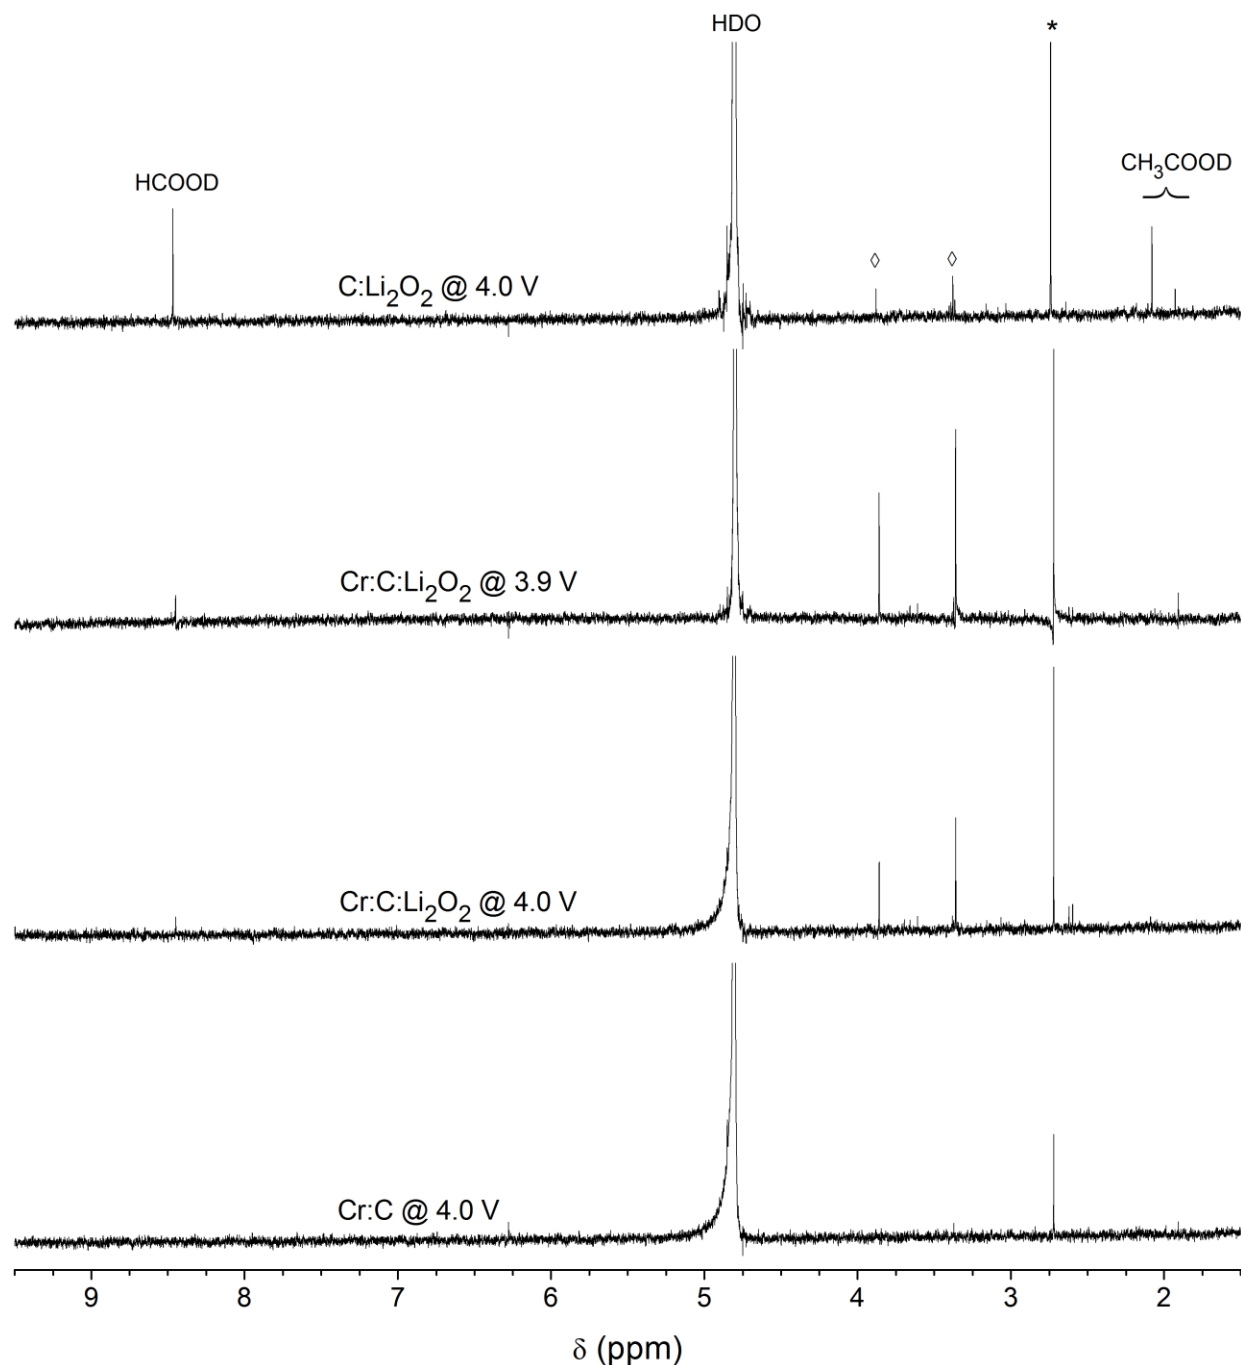

**Fig. S10:** (top to bottom) NMR spectra of C:Li<sub>2</sub>O<sub>2</sub>:Nafion<sup>®</sup> = 1:1:1 charged at 4.0 V<sub>Li</sub>, Cr:C:Li<sub>2</sub>O<sub>2</sub>:Nafion<sup>®</sup> = 0.66:1:1 charged at 3.9 V<sub>Li</sub>, Cr:C:Li<sub>2</sub>O<sub>2</sub>:Nafion<sup>®</sup> = 0.66:1:1 charged at 4.0 V<sub>Li</sub> and Cr:C:Nafion<sup>®</sup> = 0.66:1:1 polarized at 4.0 V<sub>Li</sub>. Unidentified peaks at  $\delta$  = 3.86 and 3.36 ppm (◊) appear tied to the presence of Li<sub>2</sub>O<sub>2</sub> as they are absent from the Cr:C:Nafion<sup>®</sup> without Li<sub>2</sub>O<sub>2</sub>. These unidentified peaks were also noted in the work by Freunberger et al.<sup>3</sup> The peak at  $\delta$  = 2.72 (\*) is tied to the presence of carbon as it is observed in all electrodes with and without chromium and was not observed in electrodes without carbon (spectrum not shown).

**Discharge product in discharged Cr NP-catalyzed Li-O<sub>2</sub> cells**

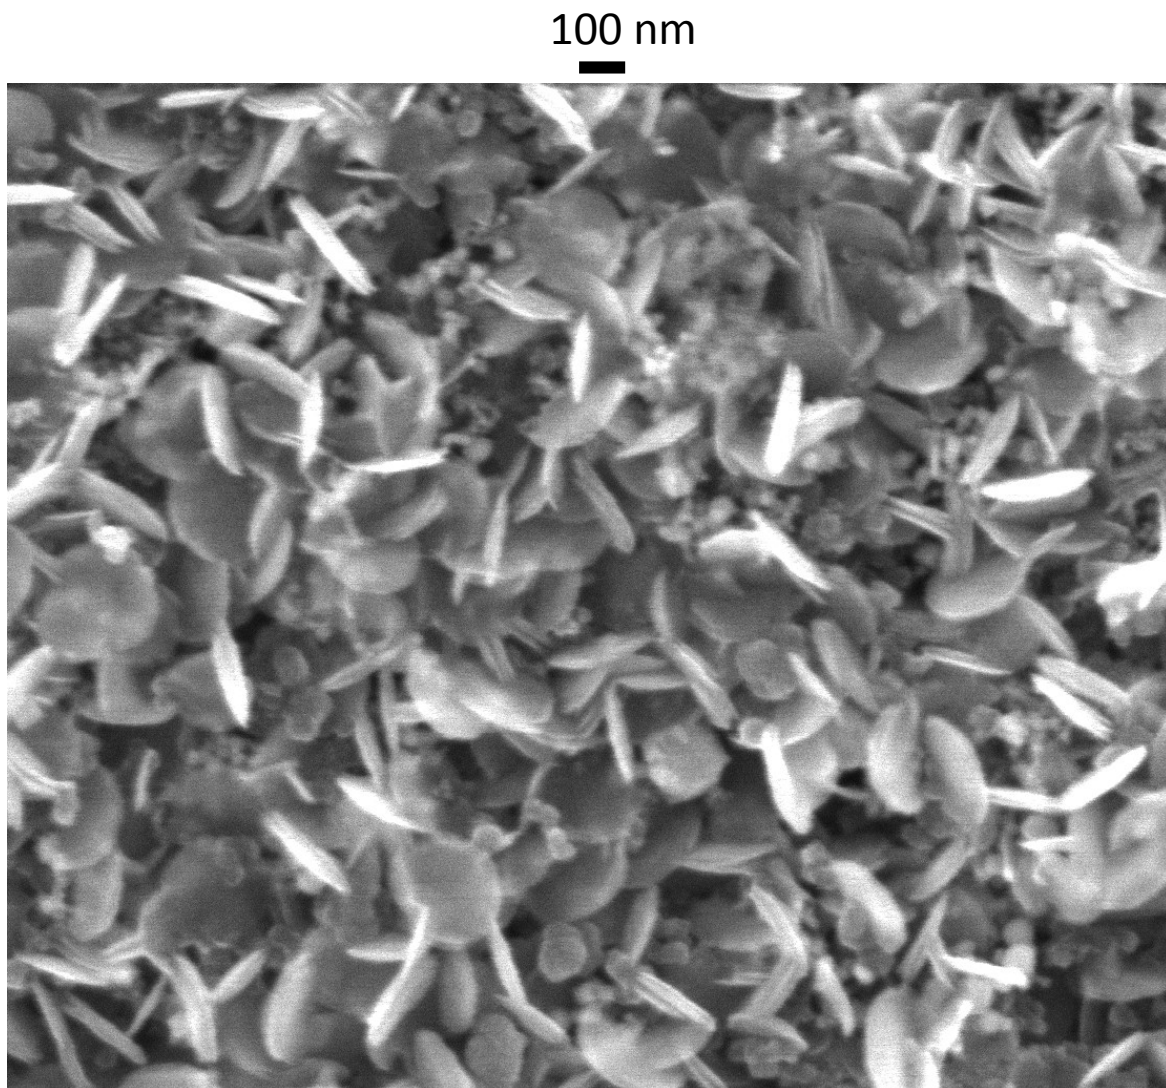

**Fig. S11:** SEMs of discharged Cr/C (Cr:C:Nafion<sup>®</sup> = 2:1:0.5) Li-O<sub>2</sub> electrode. ~200 nm particles of Li<sub>2</sub>O<sub>2</sub> confirmed by XRD (Fig. S12) are visible and covering the carbon structure. Smaller ~40 nm point-particles are Cr NP.

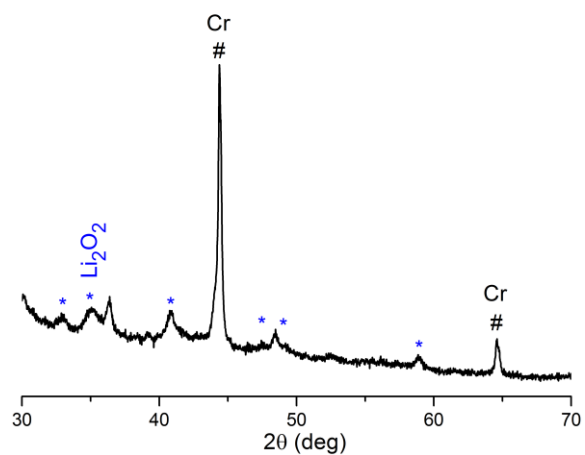

**Fig. S12:** Post-discharge XRD of Cr/C (Cr:C:Nafion<sup>®</sup> = 2:1:1) Li-O<sub>2</sub> electrode. The discharge product is confirmed to be crystalline Li<sub>2</sub>O<sub>2</sub>.

### X-ray absorption analysis of carbon-free Cr NP-catalyzed electrodes

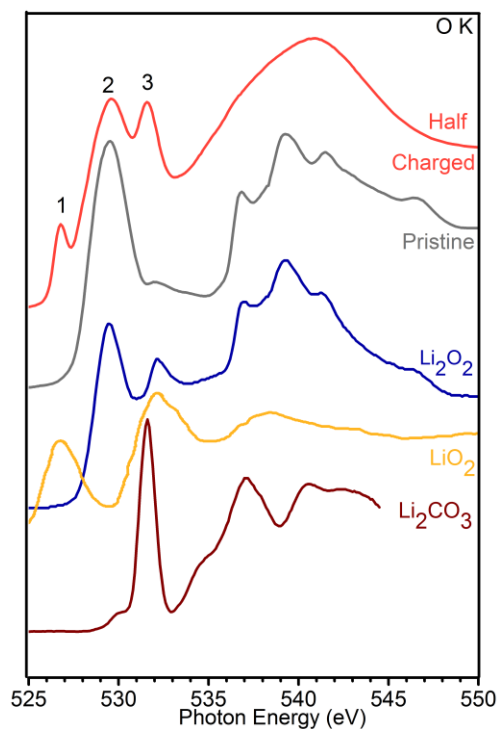

**Fig.S13:** Comparison of O K-edge XANES spectra of the pristine and half-charged Cr: $\text{Li}_2\text{O}_2$  electrodes to reference spectra of  $\text{Li}_2\text{CO}_3$ ,  $\text{Li}_2\text{O}_2$ <sup>16, 40</sup> and  $\text{LiO}_2$ <sup>5</sup>. Energies are calibrated to the spectral features of  $\text{Li}_2\text{O}_2$  in the as-made Cr: $\text{Li}_2\text{O}_2$  electrode.



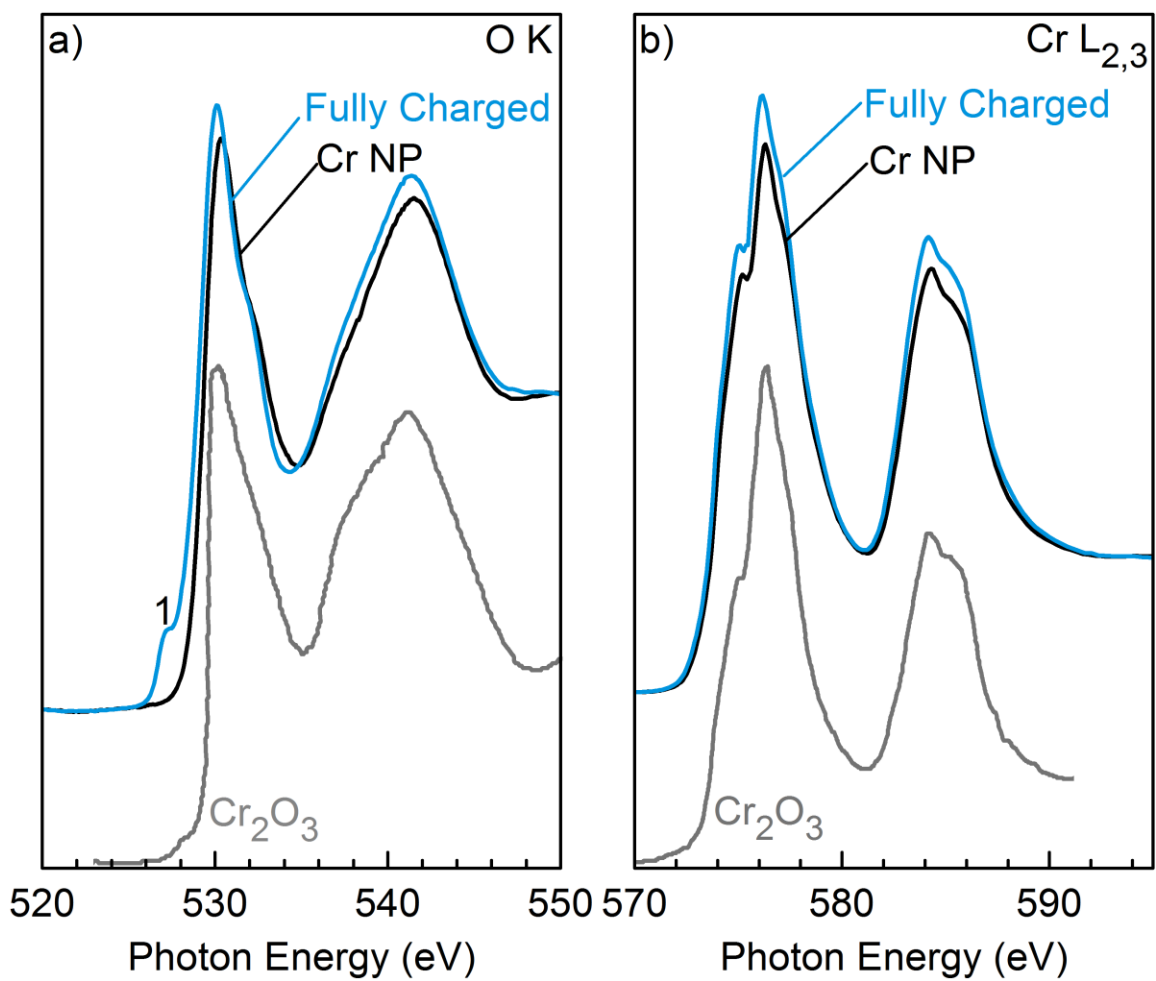

**Fig. S14:** Comparison of O K-edge XANES spectra of the as-purchased and fully-charged Cr:Li<sub>2</sub>O<sub>2</sub> electrodes to reference spectra of Cr<sub>2</sub>O<sub>3</sub>.<sup>6,7</sup>



**Table S1:** Literature values for Li<sub>2</sub>O<sub>2</sub> oxidation activities under various cell conditions

| Catalyst                                                                                        | Electrolyte used                                | Rate<br>(mA g <sup>-1</sup><br>Carbon) | Rate<br>(mA g <sup>-1</sup><br>Li <sub>2</sub> O <sub>2</sub> )* | Rate<br>(μA<br>cm <sup>-2</sup><br>Carbon) | Rate<br>(μA<br>cm <sup>-2</sup><br>Cat) | Rate (μA<br>cm <sup>-2</sup><br>Carbon+Cat) | Charging<br>voltage<br>(V) | Cathode structure                                                                                                      |
|-------------------------------------------------------------------------------------------------|-------------------------------------------------|----------------------------------------|------------------------------------------------------------------|--------------------------------------------|-----------------------------------------|---------------------------------------------|----------------------------|------------------------------------------------------------------------------------------------------------------------|
| Pt/VC                                                                                           | 0.1 M LiClO <sub>4</sub> 1,2<br>Dimethoxyethane | 70                                     | 70                                                               | 0.070                                      | 0.114                                   | 0.043                                       | ~3.6                       | Li <sub>2</sub> O <sub>2</sub> -prefilled<br>(VC:Catalyst:Li <sub>2</sub> O <sub>2</sub><br>= 1:0.66:1) <sup>8</sup>   |
| Ru/VC                                                                                           |                                                 |                                        |                                                                  | 0.070                                      | 0.088                                   | 0.039                                       | ~3.6                       |                                                                                                                        |
| Au/VC                                                                                           |                                                 |                                        |                                                                  | 0.070                                      | 0.482                                   | 0.061                                       | ~4.2                       |                                                                                                                        |
| Vulcan Carbon (VC)                                                                              |                                                 |                                        |                                                                  | 0.070                                      | 0.070                                   | 0.035                                       | ~4.1                       |                                                                                                                        |
| KB/Acid leached<br>Na <sub>0.44</sub> MnO <sub>2</sub>                                          | 1 M LiPF <sub>6</sub><br>TEGDME                 | 70                                     | 7.4                                                              | 0.009                                      | 0.255                                   | 0.008                                       | ~3.8                       | Li-O <sub>2</sub> cell<br>(KB:Catalyst =<br>1:0.4) <sup>9</sup>                                                        |
| KB/Pristine Na <sub>0.44</sub> MnO <sub>2</sub>                                                 |                                                 |                                        | 14                                                               | 0.009                                      | 0.384                                   | 0.008                                       | ~4.0                       |                                                                                                                        |
| Ketjen black (KB)                                                                               |                                                 |                                        | 41                                                               | 0.009                                      | 0.009                                   | 0.008                                       | ~4.1                       |                                                                                                                        |
| KB/Lead ruthenate                                                                               | 1 M LiPF <sub>6</sub><br>TEGDME                 | 70                                     | 14                                                               | 0.009                                      | 0.106                                   | 0.008                                       | ~4.0                       | Li-O <sub>2</sub> cell<br>(KB:Catalyst =<br>1:1) <sup>10</sup>                                                         |
| KB/Bismuth ruthenate                                                                            |                                                 |                                        | 14                                                               | 0.009                                      | 0.068                                   | 0.008                                       | ~4.0                       |                                                                                                                        |
| Ketjen Carbon (KB)                                                                              |                                                 |                                        | 27                                                               | 0.009                                      | 0.009                                   | 0.004                                       | ~4.2                       |                                                                                                                        |
| KB/<br>La <sub>1.7</sub> Ca <sub>0.3</sub> Ni <sub>0.75</sub> Cu <sub>0.25</sub> O <sub>4</sub> | 1 M LiPF <sub>6</sub><br>TEGDME                 | 20                                     | 67                                                               | 0.008                                      | 1.811                                   | 0.008                                       | ~3.6                       | Li <sub>2</sub> O <sub>2</sub> -prefilled<br>(KB:Catalyst:Li <sub>2</sub> O <sub>2</sub><br>= 1:0.3:0.3) <sup>11</sup> |
| Super P (No catalyst)                                                                           | 0.1M LiClO <sub>4</sub> ,<br>DMF                | 70                                     | 54                                                               | 0.113                                      | 0.113                                   | 0.113                                       | ~3.6                       | LiFePO <sub>4</sub> -O <sub>2</sub> cell <sup>12</sup>                                                                 |
| Super P (No catalyst)                                                                           | 0.1M LiClO <sub>4</sub> ,<br>DMSO               | 70                                     | 164                                                              | 0.113                                      | 0.113                                   | 0.113                                       | ~4.1                       | Li-O <sub>2</sub> cell <sup>13</sup>                                                                                   |

|                                       |                                |                        |      |       |       |       |      |                                                                 |
|---------------------------------------|--------------------------------|------------------------|------|-------|-------|-------|------|-----------------------------------------------------------------|
| Super P/Gold nano composite electrode | 0.1M LiClO <sub>4</sub> , DMSO | 70                     | 164  | 0.113 | 1.120 | 0.103 | ~3.8 | Li-O <sub>2</sub> cell (Super P:PTFE: Au = 8:1:1) <sup>13</sup> |
| Nanoporous Gold                       | 0.1M LiClO <sub>4</sub> , DMSO | 500 mA/g <sub>Au</sub> | 1947 | N/A   | 1.000 | 1.000 | ~3.5 | Li-O <sub>2</sub> cell <sup>13</sup>                            |

\* Normalized to the weight of Li<sub>2</sub>O<sub>2</sub> (preloaded or electrochemically-formed) right before charging

### Surface areas of catalyst particles

**Table S2:** SEM calculated particles size and surface areas of the perovskites investigated.

| Oxide              | $d_{v/a}$ (nm) | Surface Area ( $\text{m}^2/\text{g}_{\text{ox}}$ ) |
|--------------------|----------------|----------------------------------------------------|
| BSCF               | 647.22         | 1.596                                              |
| LaMnO <sub>3</sub> | 574.53         | 1.821                                              |
| LaNiO <sub>3</sub> | 206.11         | 4.108                                              |
| LaFeO <sub>3</sub> | 454.05         | 1.981                                              |
| LaCrO <sub>3</sub> | 951.08         | 0.946                                              |

Extraction of the surface areas from SEM images was done following the same procedure detailed by Suntivich et al.<sup>2</sup> The following formula is employed:

$$A_s = \frac{6}{\rho \cdot d_{v/a}} \text{ with } d_{v/a} = \frac{\sum d^3}{\sum d^2}$$

Where  $d$  is the average diameter of particles approximated as spherical.  $d$  is calculated based on the measured surface area (using ImageJ image processing software, offered by NIH) of particles observed. The same procedure is used by Harding et al.<sup>8</sup> in extracting the surface areas of Pt, Ru and Au in Pt/C, Ru/C, and Au/C catalysts.

In the case of Cr-nanoparticles and Cr<sub>2</sub>O<sub>3</sub>, surface area was obtained using Brunauer–Emmett–Teller (BET) measurements using nitrogen adsorption/desorption. The measurement yielded a surface area of  $\sim 24 \text{ m}^2/\text{g}_{\text{Cr NP}}$  for Cr NP, in good agreement with the values of (20-30  $\text{m}^2/\text{g}_{\text{Cr NP}}$ ) reported by the manufacturer (US Research Nanomaterials Inc.). The surface area of Cr<sub>2</sub>O<sub>3</sub> was measured at  $\sim 20 \text{ m}^2/\text{g}_{\text{Cr2O3}}$ .

## REFERENCES

1. J. Suntivich, H. A. Gasteiger, N. Yabuuchi, H. Nakanishi, J. B. Goodenough and Y. Shao-Horn, *Nat. Chem.*, 2011, **3**, 546-550.
2. J. Suntivich, K. J. May, H. A. Gasteiger, J. B. Goodenough and Y. Shao-Horn, *Science*, 2011, **334**, 1383-1385.
3. S. A. Freunberger, Y. Chen, N. E. Drewett, L. J. Hardwick, F. Bardé and P. G. Bruce, *Angew. Chem. Int. Ed.*, 2011, **50**, 8609-8613.
4. R. Black, S. H. Oh, J. H. Lee, T. Yim, B. Adams and L. F. Nazar, *J. Am. Chem. Soc.*, 2012, **134**, 2902-2905.
5. M. W. Ruckman, J. Chen, S. L. Qiu, P. Kuiper, M. Strongin and B. I. Dunlap, *Phys. Rev. Lett.*, 1991, **67**, 2533-2536.
6. T. Schedel-Niedrig, *Fresenius J. Anal. Chem.*, 1998, **361**, 680-682.
7. M. O. Figueiredo, A. C. dos Santos, M. J. Carmezim, M. Abbate, F. M. F. de Groot, H. Petersen and W. Braun, *Analyst*, 1994, **119**, 609-611.
8. J. R. Harding, Y. C. Lu, Y. Tsukada and Y. Shao-Horn, *Phys. Chem. Chem. Phys.*, 2012, **14**, 10540-10546.
9. J.-H. Lee, R. Black, G. Popov, E. Pomerantseva, F. Nan, G. A. Botton and L. F. Nazar, *Energy Environ. Sci.*, 2012, **5**, 9558-9565.
10. S. H. Oh and L. F. Nazar, *Adv. Energy Mater.*, 2012, **2**, 903-910.
11. K.-N. Jung, J.-I. Lee, W. B. Im, S. Yoon, K.-H. Shin and J.-W. Lee, *Chem. Commun.*, 2012, **48**, 9406-9408.
12. Y. Chen, S. A. Freunberger, Z. Peng, F. Bardé and P. G. Bruce, *J. Am. Chem. Soc.*, 2012, **134**, 7952-7957.
13. Z. Peng, S. A. Freunberger, Y. Chen and P. G. Bruce, *Science*, 2012, **337**, 563-566.
